# Supplementary material for: Generation and Characterization of a Novel Angelman Syndrome Mouse Model with a Full Deletion of the Ube3a Gene
Source: MDPI journal article supplement (doi:10.3390/cells11182815), 2022-09-09
Supplement: s1 [file s1]

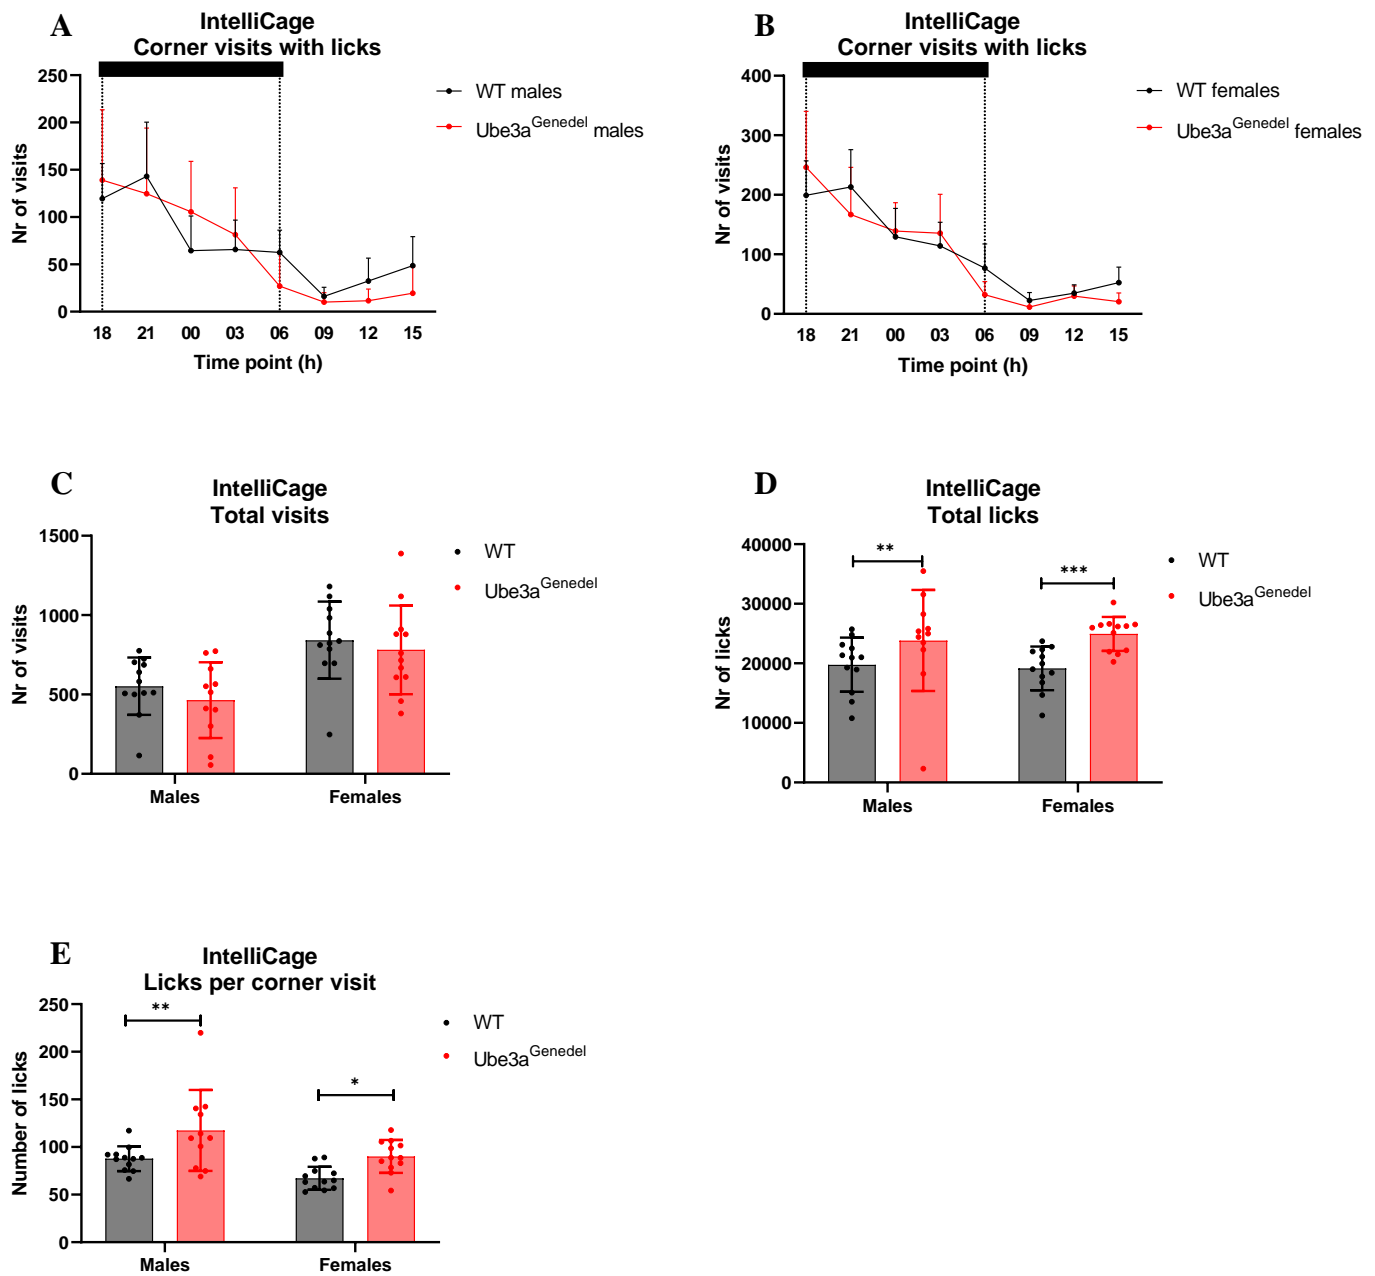

**Supplementary Figure S2.** IntelliCage results licks and corner visits. A-B Circadian activity in corner visits not differing between Ube3a<sup>Genedel</sup> and WT mice. c Overall corner visits does not differ over a 7-day period. D Ube3a<sup>Genedel</sup> mice exhibit an increase in lick number over the entire period of 7 days. E Ube3a<sup>Genedel</sup> mice displayed more licks per visit than WT controls. Two-way ANOVA with dependent measurements, genotype main effect,  $p < 0.001$ , depicted with mean  $\pm$  SD. Significant effects of genotype are indicated as \* $p < 0.05$ , \*\* $p < 0.01$ , and \*\*\* $p < 0.001$ , \*\*\*\* $p < 0.0001$  for genotype significance
