# Supplementary material for: Generation and Characterization of a Novel Angelman Syndrome Mouse Model with a Full Deletion of the Ube3a Gene
Source: MDPI journal article supplement (doi:10.3390/cells11182815), 2022-09-09
Supplement: s1 [file s1]

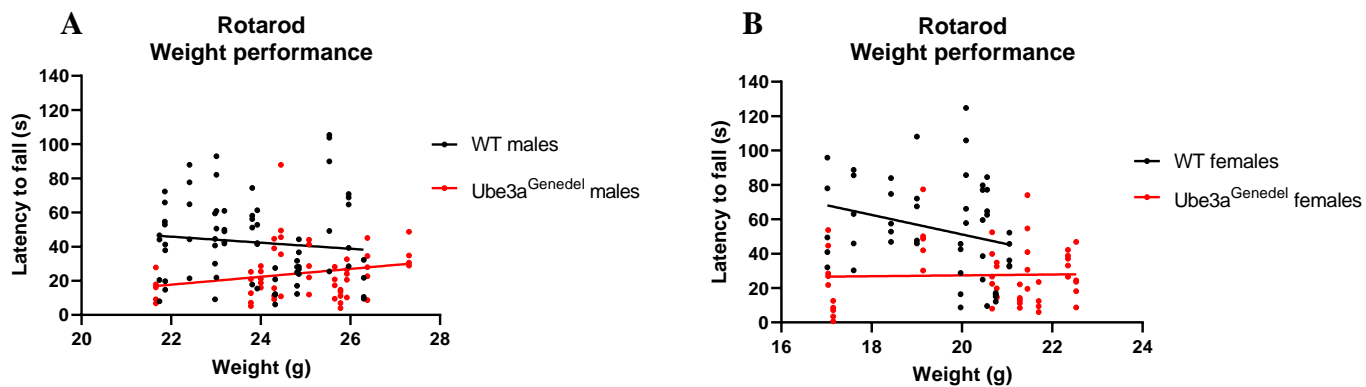

**Supplementary Figure S1.** Weight and latency to fall in rotarod. **A-B** Weight of the animals plotted against the latency to fall, pooled for all days, linear model fit main weight effect  $p=0.68$ , mean  $\pm$  SD.
